# Supplementary material
Source: publisher figshare collection journal article supplement (https://sage.figshare.com/ndownloader/files/14052722)
Supplement: Supplementary file 1 [file 14052722]

## APPENDIX

### A.1. Connection between U-Index and Area Under the ROC Curve

Let  $F(g)$ ,  $F_D(g)$  and  $F_{\bar{D}}(g)$  denote the c.d.f of ordered genotype  $g$ ,  $g \in \{g_1, \dots, g_K\}$  in the entire populations, diseased population and non-diseased population, respectively, so that

$$F(g) = P(G \leq g); F_D(g) = P(G \leq g | D); \text{ and } F_{\bar{D}}(g) = P(G \leq g | \bar{D})$$

A classification rule can be formed by using a particular multi-locus genotype  $g$  as threshold:

$$\hat{Y}_G = \begin{cases} 1 & r_G > r_g \\ 0 & r_G \leq r_g \end{cases}$$

The ROC curve can then be represented by a map:  $f : t \rightarrow f(t)$ , so that

$$t_g = 1 - P(\hat{Y}_g = 0 | \bar{D}) = 1 - F_{\bar{D}}(g); \text{ and } f(t_g) = P(Y_g = 1 | D) = 1 - F_D(g).$$

On the other hand, the predictiveness curve can be represented by a map:  $r : q \rightarrow r(q)$ , so that

$$q = F(g); \text{ and } r(q) = P(D | g)$$

Let  $F'(g)$  and  $F'_{\bar{D}}(g)$  be the p.d.f of ordered genotype  $g$  in the diseased and non-disease populations, respectively, we would have

$$f'(t_g) = \frac{df(t_g)}{dt_g} = \frac{F'_D(g)}{F'_{\bar{D}}(g)}.$$

It follows then:

$$q = F(g) = \rho F_D(g) + (1 - \rho) F_{\bar{D}}(g) = \rho(1 - f(t_g)) + (1 - \rho)(1 - t_g)$$

$$\begin{aligned} r(q) &= P(D | g) \\ &= \frac{P(g | D)P(D)}{P(g | D)P(D) + P(g | \bar{D})P(\bar{D})} \\ &= \frac{F'_D(g)\rho}{F'_D(g)\rho + F'_{\bar{D}}(g)(1 - \rho)} \\ &= \frac{f'(t_g)\rho}{f'(t_g)\rho + (1 - \rho)} \end{aligned}$$

Now we aim to express  $U = 2 \int_0^1 \int_0^y (r(y) - r(x)) dx dy$  in the form of  $f(\cdot)$ . First, let

$$x = \rho(1 - f(t_g)) + (1 - \rho)(1 - t_g)$$

$$y = \rho(1 - f(s_g)) + (1 - \rho)(1 - s_g)$$

It follows that

$$\frac{dx}{dt_g} = -(1 - \rho) - \rho f'(t_g)$$

Since  $f(0) = 0$  and  $f(1) = 1$ , we know

$$x = 1 \Leftrightarrow t_g = 0$$

$$x = 0 \Leftrightarrow t_g = 1.$$

It follows then

$$\begin{aligned} U &= 2 \int_0^1 \int_0^y (r(y) - r(x)) dx dy \\ &= 2 \int_0^1 \int_0^s \left( \frac{f'(s)\rho}{f'(s)\rho + (1 - \rho)} - \frac{f'(t)\rho}{f'(t)\rho + (1 - \rho)} \right) [(1 - \rho) + \rho f'(t)] [(1 - \rho) + \rho f'(s)] dt ds \\ &= 2 \int_0^1 f'(s)\rho \int_s^1 [(1 - \rho) + \rho f'(t)] dt ds - 2 \int_0^1 [(1 - \rho) + \rho f'(s)] \int_s^1 f'(t)\rho dt ds \\ &= 2 \int_0^1 f'(s)\rho [(1 - \rho)(1 - s) + \rho(1 - f(s))] ds - 2 \int_0^1 [(1 - \rho) + \rho f'(s)] ds \\ &= 2\rho(1 - \rho) \int_0^1 [f'(s) - sf'(s) - 1 + f(s)] ds \end{aligned}$$

In addition, because  $\int_0^1 f'(s) ds = 1$  and  $\int_0^1 sf'(s) ds = sf(s)|_0^1 - \int_0^1 f(s) ds$ , the above equation can be

simplified as

$$U = 2\rho(1 - \rho) [2 \int_0^1 f(s) ds - 1] = 2\rho(1 - \rho)(2AUC_R - 1)$$

## A.2. Connection between U-Index and Area Under the Lorenze Curve

We first show the connection between area under the ROC curve ( $AUC_R$ ) and the area under the Lorenze Curve ( $AUC_L$ ).

$$\begin{aligned}AUC_L &= \frac{1}{\rho} \int_0^1 \int_0^y r(x) dx dy \\&= \int_0^1 [1 - \rho + \rho f'(s)] ds \int_s^1 f'(t) dt \\&= \int_0^1 [1 - f(s)] [1 - \rho + \rho f'(s)] ds \\&= (1 - \rho) (1 - \int_0^1 f(s) ds) + \rho \int_0^1 f'(s) ds - \rho \int_0^1 f(s) f'(s) ds \\&= (1 - \rho) (1 - AUC_R) + \rho - \rho \int_0^1 f(s) f'(s) ds\end{aligned}$$

Since  $\int_0^1 f(s) f'(s) ds = f(s) f(s) \big|_0^1 - \int_0^1 f'(s) f(s) ds$  and  $f(1) = 1$ ,  $f(0) = 0$ , we have

$$AUC_L = (1 - \rho) (1 - AUC_R) + \frac{1}{2} \rho$$

Further from  $U = 2\rho(1 - \rho)(2AUC_R - 1)$ , it follows

$$U = 2\rho(0.5 - AUC_L)$$

### A.3. Connection between U-Index and two-sample U-Statistics

The U-Index can be estimated as

$$U = 2 \sum_{1 \leq k < k' \leq K} p_k p_{k'} \psi(r_k, r_{k'}) = 2 \sum_{1 \leq k < k' \leq K} p_k p_{k'} (r_k - r_{k'});$$

where  $p_k$  and  $r_k$  are calculated from  $P(G_k | D)$  and  $P(G_k | \bar{D})$ . As a result, we write U-Index as:

$$\begin{aligned} U &= 2 \sum_{k=1}^K \sum_{k'=1}^k p_k p_{k'} (r_k - r_{k'}) \\ &= 2 \sum_{k=1}^K P(g_k, D) \sum_{k'=1}^k P(g_{k'}) - 2 \sum_{k=1}^K P(g_k) \sum_{k'=1}^k P(g_{k'}, D) \\ &= 2 \sum_{k=1}^K \rho P(g_k | D) \sum_{k'=1}^k [\rho P(g_{k'} | D) + (1 - \rho) P(g_{k'} | \bar{D})] - 2 \sum_{k=1}^K [\rho P(g_k | D) + (1 - \rho) P(g_k | \bar{D})] \sum_{k'=1}^k \rho P(g_{k'} | D) \\ &= 2 \rho (1 - \rho) \left[ \sum_{k=1}^K P(g_k | D) \sum_{k'=1}^k P(g_{k'} | \bar{D}) - \sum_{k=1}^K P(g_k | \bar{D}) \sum_{k'=1}^k P(g_{k'} | D) \right] \end{aligned}$$

It follows:

$$U = 2 \rho (1 - \rho) \left[ \sum_{k=1}^K \sum_{k'=1}^K P(g_k | D) P(g_{k'} | \bar{D}) (I_{\{k > k'\}} - I_{\{k < k'\}}) \right];$$

where  $I_{\{ \cdot \}}$  is an indicator function. Further, based on estimator

$$P(g_k | D) = \frac{n_{gk, D}}{n_D} \quad \text{and} \quad P(g_k | \bar{D}) = \frac{n_{gk, \bar{D}}}{n_{\bar{D}}}$$

we can show that the U-Index is equivalent to a two-sample U-Statistic.

$$\begin{aligned} U &= 2 \rho (1 - \rho) \frac{1}{n_D n_{\bar{D}}} \left[ \sum_{k=1}^K \sum_{k'=1}^K n_{gk, D} n_{gk', \bar{D}} (I_{\{k > k'\}} - I_{\{k < k'\}}) \right] \\ &= 2 \rho (1 - \rho) \frac{1}{n_D n_{\bar{D}}} \sum_{i=1}^{n_D} \sum_{j=1}^{n_{\bar{D}}} \phi(G_i, G_j) \end{aligned}$$

where  $G_i$  is the genotype of the  $i$ -th subject in diseased population;  $G_j$  is the genotype of the  $j$ -th subject in non-diseased population. The kernel function has the following form:

$$\phi(G_i, G_j) = \begin{cases} 1 & r(G_i) > r(G_j) \\ 0 & r(G_i) = r(G_j) \\ -1 & r(G_i) < r(G_j) \end{cases}$$

Further denote  $\theta = E(\phi(G_i, G_j))$  and  $\theta_U = E(U) = 2\rho(1-\rho)\theta$ . We can estimate the variance of

$$\begin{aligned} Var(U - \theta_U) &= \frac{4\rho^2(1-\rho)^2}{n_D^2 n_{\bar{D}}^2} Var\left[\sum_{i=1}^{n_D} \sum_{j=1}^{n_{\bar{D}}} (\phi(G_i, G_j) - \theta)\right] \\ &= \frac{4\rho^2(1-\rho)^2}{n_D^2 n_{\bar{D}}^2} [n_D n_{\bar{D}} \tau_{1,1} + n_D n_{\bar{D}} (n_{\bar{D}} - 1) \tau_{1,0} + n_D n_{\bar{D}} (n_D - 1) \tau_{0,1}] \end{aligned} ;$$

where  $\tau_{1,1} = Var(\phi(G_i, G_j))$ ,  $\tau_{1,0} = cov(\phi(G_i, G_j), \phi(G_i, G_{j'}))$  and  $\tau_{0,1} = cov(\phi(G_i, G_j), \phi(G_{i'}, G_j))$ .

To obtain the asymptotic distribution of  $U$ , we can use Hajek projection to project  $U - \theta_U$  onto the space of the summation forms  $\sum_{i=1}^n b(G_i)$  where the CLT can be applied. The Hajek projection

$\tilde{U}$  of  $U - \theta_U$  is,

$$\begin{aligned} \tilde{U} &= \sum_{i=1}^{n_D} E(U - \theta_U | G_i) + \sum_{j=1}^{n_{\bar{D}}} E(U - \theta_U | G_j) \\ &= \frac{2\rho(1-\rho)}{n_D} \sum_{i=1}^{n_D} h_{1,0}(G_i) + \frac{2\rho(1-\rho)}{n_{\bar{D}}} \sum_{j=1}^{n_{\bar{D}}} h_{0,1}(G_j) \end{aligned} ;$$

where  $h_{1,0}(G_i) = E(\phi(G_i, G_j) - \theta | G_i)$  and  $h_{0,1}(G_j) = E(\phi(G_i, G_j) - \theta | G_j)$ . We can then calculate

the variance of  $\tilde{U}$  as

$$\begin{aligned}
Var(\tilde{U}) &= \frac{4\rho^2(1-\rho)^2}{n_D} Var(h_{1,0}(G_i)) + \frac{4\rho^2(1-\rho)^2}{n_{\bar{D}}} Var(h_{0,1}(G_j)) \\
&= 4\rho^2(1-\rho)^2 \left[ \frac{\tau_{1,0}}{n_D} + \frac{\tau_{0,1}}{n_{\bar{D}}} \right]
\end{aligned}$$

We can write  $U - \theta_U$  as a summation of the projection term  $\tilde{U}$  and the remaining term  $\bar{R}$ , i.e.

$U - \theta_U = \tilde{U} + \bar{R}$ . The asymptotic normality of  $U - \theta_U$  is then established by showing is  $\tilde{U}$

asymptotically normal and  $\bar{R}$  is asymptotically negligible. Assuming  $n = n_D + n_{\bar{D}}$  and  $\frac{n_D}{n} \rightarrow \lambda$ ,

we can apply CLT to  $\tilde{U}$  and show that

$$\sqrt{n}\tilde{U} \rightarrow N(0, 4\rho^2(1-\rho)^2 \left[ \frac{\tau_{1,0}}{\lambda} + \frac{\tau_{0,1}}{1-\lambda} \right])$$

With the fact that  $E(\tilde{U}) = 0$ ,  $E(\bar{R}) = 0$  and  $E(\tilde{U}\bar{R}) = 0$ , we know

$$E(n\bar{R}^2) = nVar(U - \theta) - nVar(\tilde{U}) \rightarrow 0$$

Thus,  $\sqrt{n}\bar{R} \xrightarrow{p} 0$ . With Slutsky theorem, it follows that

$$\sqrt{n}(U - \theta) \rightarrow N(0, 4\rho^2(1-\rho)^2 \left[ \frac{\tau_{1,0}}{\lambda} + \frac{\tau_{0,1}}{1-\lambda} \right])$$
